# Supplementary material for: Predictive Value of MiR-219-1, MiR-938, MiR-34b/c, and MiR-218 Polymorphisms for Gastric Cancer Susceptibility and Prognosis
Source: Hindawi journal article supplement (doi:10.1155/2017/4731891), 2017-01-01

**Table S1. Relationship of *H.pylori* infection and SNPs in the control group**

| Genotype   | <i>H.pylori</i> <sup>+</sup> (N=485) | <i>H.pylori</i> <sup>-</sup> (N=504) | OR(95%CI) <sup>a</sup>    | P value      |
|------------|--------------------------------------|--------------------------------------|---------------------------|--------------|
| Rs213210   |                                      |                                      |                           |              |
| T/T        | 123(25.4%)                           | 106(21.0%)                           | 1                         |              |
| C/T        | 258(53.2%)                           | 261(51.8%)                           | 0.835(0.625-1.165)        | 0.318        |
| C/C        | 104(21.4%)                           | 137(27.2%)                           | <b>0.660(0.458-0.950)</b> | <b>0.025</b> |
| Rs2505901  |                                      |                                      |                           |              |
| T/T        | 20(4.1%)                             | 20(4.0%)                             | 1                         |              |
| C/T        | 159(32.7%)                           | 154(30.7%)                           | 1.016(0.525-1.964)        | 0.963        |
| C/C        | 307(63.2%)                           | 328(65.3%)                           | 0.920(0.485-1.746)        | 0.800        |
| Rs4938723  |                                      |                                      |                           |              |
| T/T        | 49(10.1%)                            | 35(6.9%)                             | 1                         |              |
| C/T        | 214(44.0%)                           | 216(42.9%)                           | 0.714(0.445-1.147)        | 0.163        |
| C/C        | 223(45.9%)                           | 253(50.2%)                           | 0.629(0.393-1.007)        | 0.054        |
| Rs11134527 |                                      |                                      |                           |              |
| A/A        | 198(40.7%)                           | 196(38.8%)                           | 1                         |              |
| A/G        | 211(43.4%)                           | 228(45.1%)                           | 0.917(0.698-1.204)        | 0.534        |
| G/G        | 77(15.8%)                            | 81(16.0%)                            | 0.948(0.655-1.372)        | 0.778        |

<sup>a</sup>ORs were calculated adjusting for age and sex in logistic regression model.

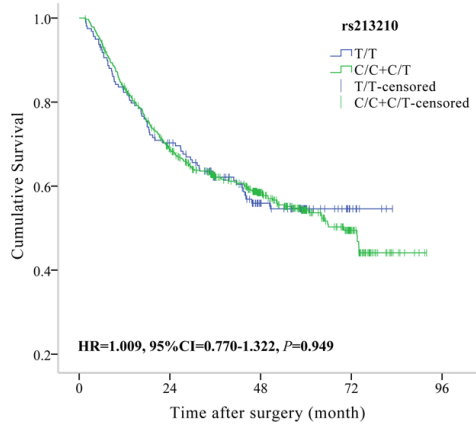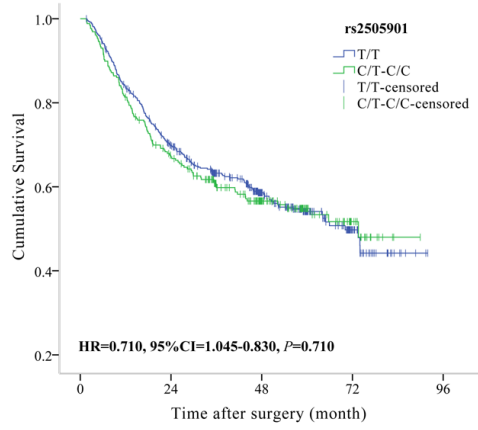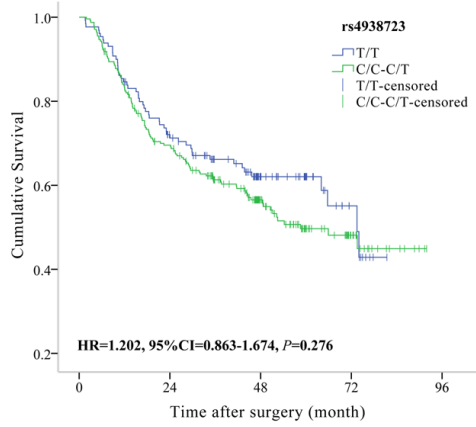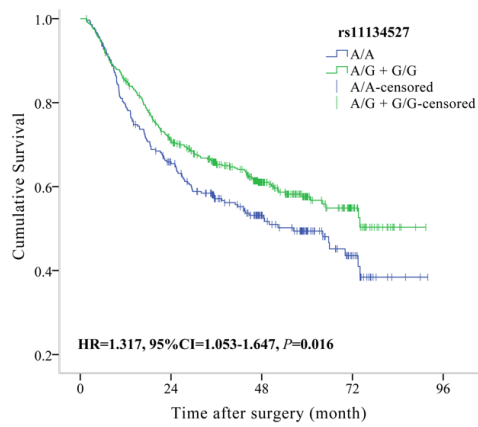

Supplement: f1 [file 4731891.f1.pdf]
